# Supplementary material
Source: ML conference proceedings conference paper supplement (https://openreview.net/forum?id=l2Wl77TSYY)

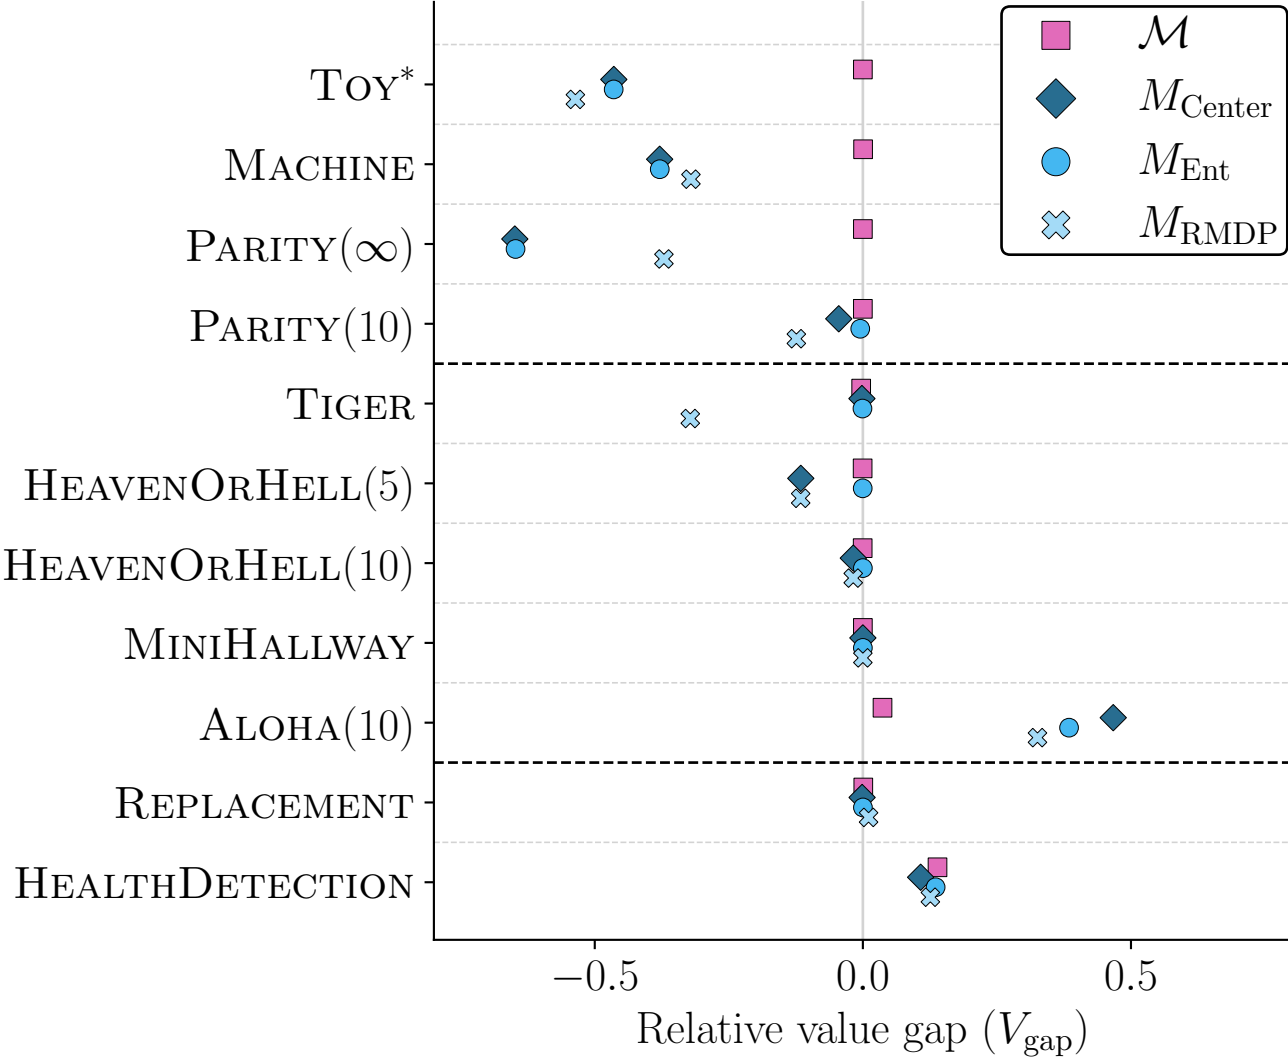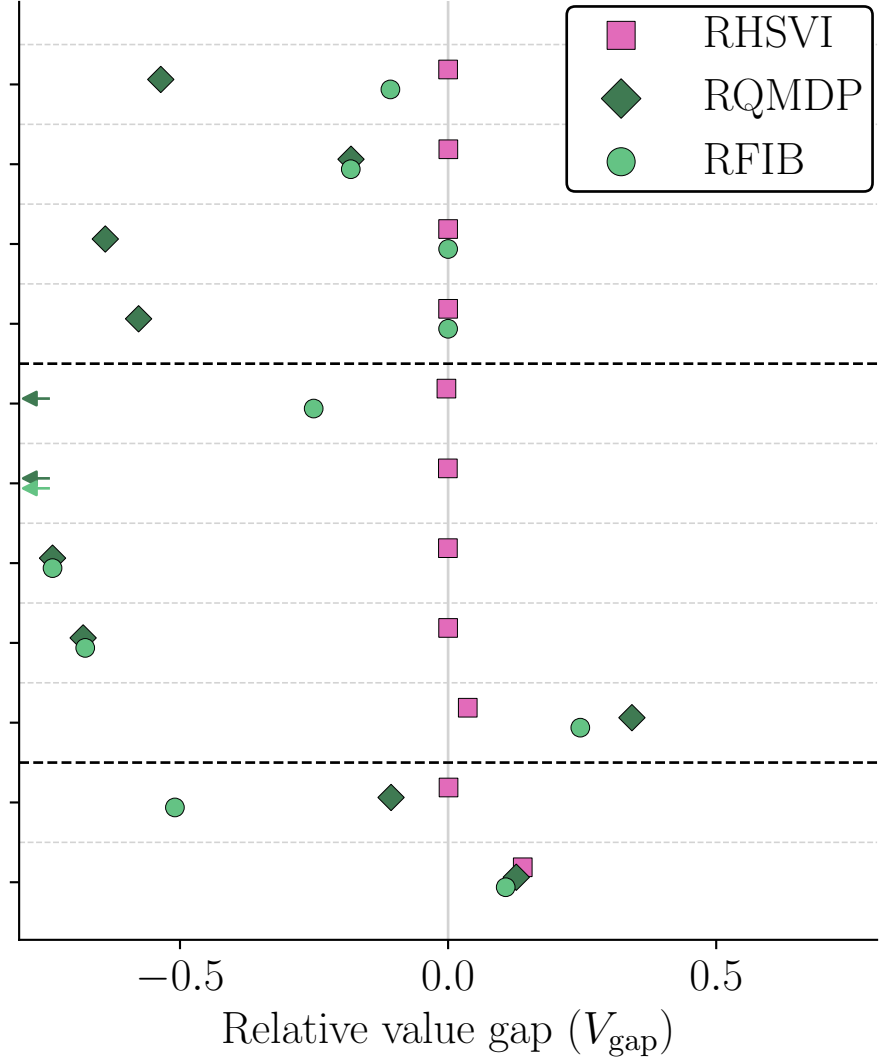

Supplement: supplementary_material [file solvability_comparison.pdf › RPOMDP_Benchmark/Data/Figures/solvability_comparison.pdf]
